# Supplementary material for: A novel synthesis of MIL-53(Al)@SiO2: an integrated photocatalyst adsorbent to remove bisphenol a from wastewater
Source: Royal Society of Chemistry journal article supplement (doi:10.1039/d0nj03714a), 2020-01-01
Supplement: d0nj03714a1.pdf [file d0nj03714a1.pdf]

**Supporting Information**

**A Novel Synthesis of MIL 53 (Al)@SiO<sub>2</sub>: An Integrated Photo Catalyst**

**Adsorbent to Remove Bisphenol A from Wastewater**

Aditi Chatterjee, Amiya Kumar Jana and Jayanta Kumar Basu\*

E-mail address: [jkb@che.iitkgp.ernet.in](mailto:jkb@che.iitkgp.ernet.in) (Jayanta Kumar Basu\*)

Department of Chemical Engineering, Indian Institute of Technology–Kharagpur,

India–721302

**Table S1** Details of the chemicals used

| Component                              | CAS Reg.<br>No. | Suppliers | Purity<br>(%) | Purification<br>method |
|----------------------------------------|-----------------|-----------|---------------|------------------------|
| Nitric acid (HNO <sub>3</sub> )        | 7697-37-2       | Merck     | 70            | Used as received       |
| N,N-Dimethylformamide<br>(DMF)         | 68-12-2         | Merck     | 98            | Used as received       |
| Terephthalic acid (H <sub>2</sub> BDC) | 100-21-0        | Merck     | 98            | Used as received       |
| Bisphenol-A (BPA)                      | 1675-54-3       | Merck     | 98            | Used as received       |

17

18 **Table S2** Experimental range and levels of independent variables

| Factor | Name                     | Minimum | Maximum | Coded Low | Coded High | Mean | Std. Dev. |
|--------|--------------------------|---------|---------|-----------|------------|------|-----------|
| A      | Aluminium foil : fly ash | 0.20    | 1       | -1 ↔ 0.32 | +1 ↔ 0.88  | 0.6  | 0.231     |
| B      | Water : DMF              | 0       | 4       | -1 ↔ 0.59 | +1 ↔ 3.41  | 2    | 1.154     |

19

20

21 **Table S3** Responses for different experimental runs

| Run | Factor 1                       | Factor 2         | Response                 |
|-----|--------------------------------|------------------|--------------------------|
|     | A : (Aluminium foil : fly ash) | B: (Water : DMF) | Adsorption uptake of BPA |
| 1   | 0.60                           | 2.00             | 45.20                    |
| 2   | 0.89                           | 0.59             | 16.61                    |
| 3   | 0.60                           | 2.00             | 45.20                    |
| 4   | 1.00                           | 2.00             | 15.00                    |
| 5   | 0.60                           | 2.00             | 45.20                    |
| 6   | 0.89                           | 3.41             | 18.25                    |
| 7   | 0.32                           | 3.41             | 24.54                    |
| 8   | 0.20                           | 2.00             | 41.20                    |
| 9   | 0.60                           | 2.00             | 45.20                    |
| 10  | 0.60                           | 2.00             | 45.20                    |
| 11  | 0.32                           | 0.59             | 26.88                    |
| 12  | 0.60                           | 4.00             | 14.07                    |
| 13  | 0.60                           | 0.00             | 12.30                    |

22

23 **Table S4** ANOVA for BPA adsorption uptake

| Sources                     | Sum of Squares | df | Mean Square | F Value | p-value |             |
|-----------------------------|----------------|----|-------------|---------|---------|-------------|
| Model                       | 2373.29        | 5  | 474.46      | 59.85   | <0.0001 | Significant |
| A- aluminium foil : fly ash | 359.29         | 1  | 359.29      | 45.32   | 0.0003  | 359.29      |

|                |         |    |         |        |         |         |
|----------------|---------|----|---------|--------|---------|---------|
| B- water : DMF | 0.41    | 1  | 0.41    | 0.051  | 0.8273  | 0.41    |
| AB             | 3.96    | 1  | 3.96    | 0.50   | 0.5026  | 3.96    |
| A <sup>2</sup> | 481.33  | 1  | 481.33  | 60.71  | 0.0001  | 481.33  |
| B <sup>2</sup> | 1731.27 | 1  | 1731.27 | 218.38 | <0.0001 | 1731.27 |
| Residual       | 55.50   | 7  | 7.93    |        |         | 55.50   |
| Lack of Fit    | 55.50   | 3  | 18.50   |        |         | 55.50   |
| Pure Error     | 0.000   | 4  | 0.000   |        |         | 0.000   |
| Cor Total      | 2427.79 | 12 |         |        |         | 2427.79 |

24

25

26 The probability plot of residual in Figure S1, shows the residuals are normally distributed and  
 27 no response transformation is needed. The studentized residual measures the number of  
 28 standard deviations, which separates the actual and predicted values.

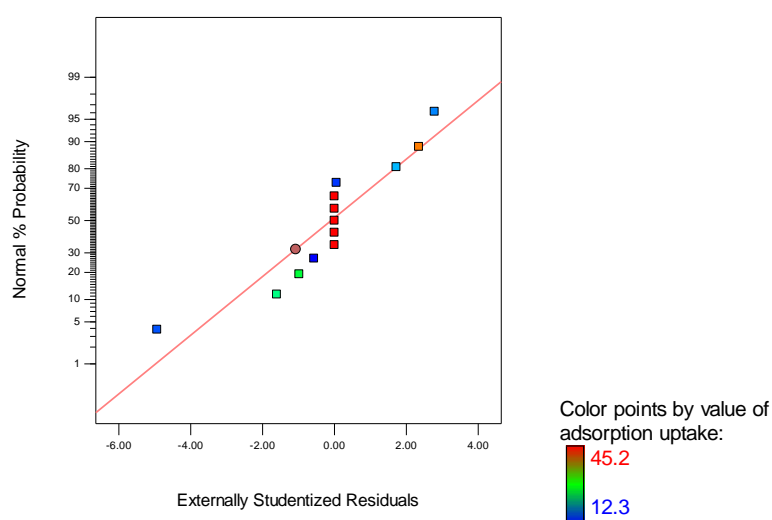

29

30 **Figure S1** The studentized residuals and normal percentage probability plot for BPA  
 31 adsorption uptake

Figure S2 represents the plot of studentized residual versus the predicted value of BPA uptake. The constant variance of observation for all the values of response is confirmed by the random scatter of the plot. Hence, there no transformation is required for the response variables.

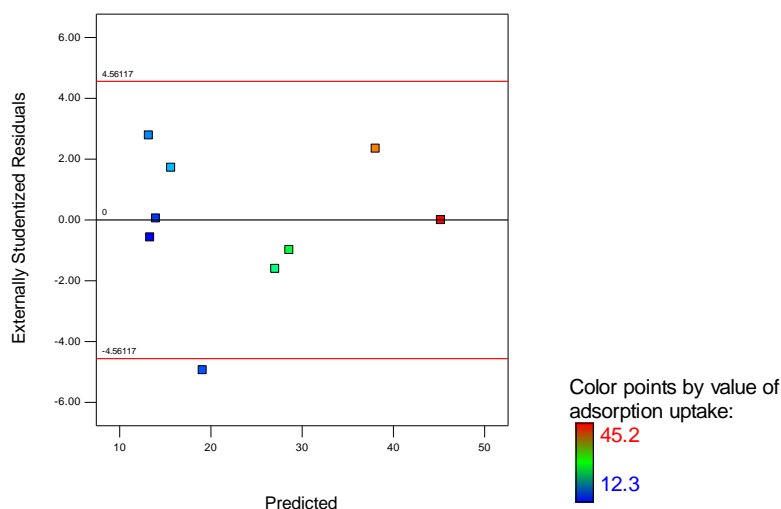

**Figure S2** The predicted uptake of BPA and studentized residuals' plot

Figure S3 shows the plot of actual versus predicted values of BPA uptake. This figure confirms that the predicted values are quite close to the actual ones. This signifies that the model is successful to predict the adsorption uptake of BPA.

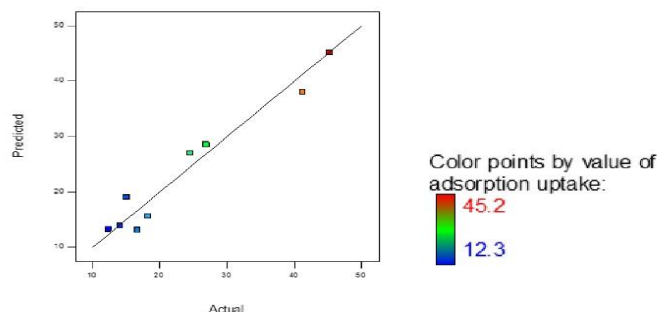

**Figure S3** The plot of actual and predicted values of BPA uptake

**Table S5** The optimum process variables for MIL 53 (Al)@SiO<sub>2</sub> synthesis

| Aluminium foil : fly ash | Water : DMF | BPA adsorption uptake(mg g <sup>-1</sup> ) |              |
|--------------------------|-------------|--------------------------------------------|--------------|
|                          |             | Predicted                                  | Experimental |
| 0.6                      | 2           | 45.2                                       | 44.9         |

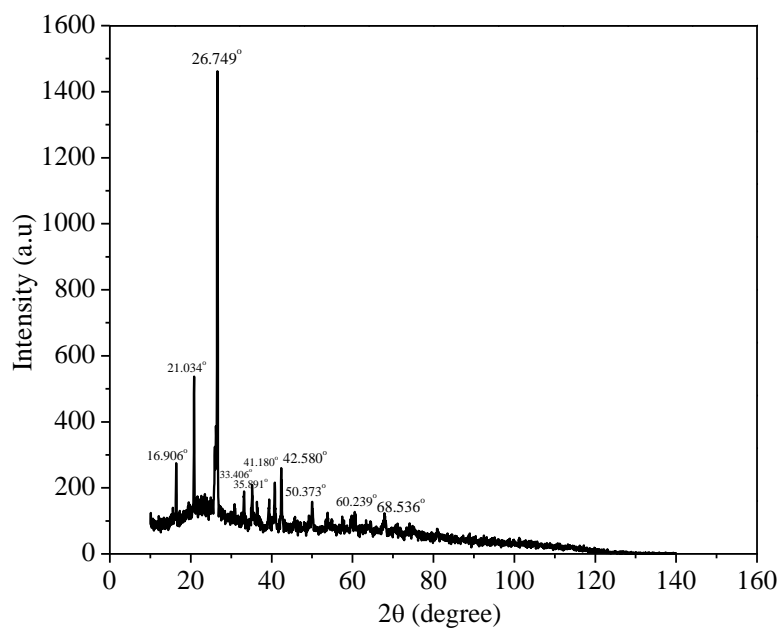

**Figure S4** XRD pattern of raw fly ash

The PXRD pattern of fly ash shown in Figure S4 confirms the majority of aluminium silicate (sillimanite) [ICDD card no. 000010626] at 33.406° corresponding to (220) facet and 41.180° corresponding to (122) facet, silicon oxide (cristobalite) [ICDD card no. 000040379] peak at 35.891° corresponding to (110) plane, peak at 42.58 corresponding to (211) facet, 60.239°

corresponding to (311) facet and  $68.536^\circ$  corresponding to (214) facet, aluminium oxide hydrate [ICDD card no. 000010259] at peaks  $26.75^\circ$  corresponding to (202) facet,  $36.65^\circ$  corresponding to (021) facet and  $50.37^\circ$  corresponding to (015) facet. On the other hand the peak at  $16.91^\circ$  corresponding to (020) plane signifies the presence of iron silicate oxide [ICDD card no. 000110262] and potassium aluminium silicate [ICDD card no. 000500437] at  $21.03^\circ$  corresponding to (211) plane.

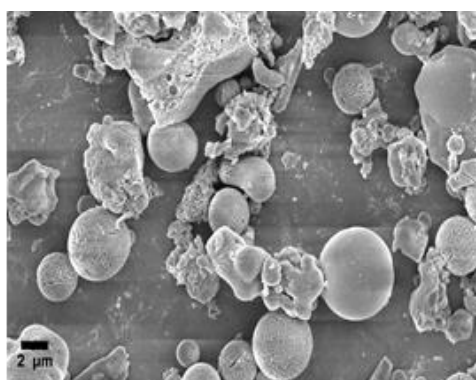

**Figure S5** SEM image of Fly ash

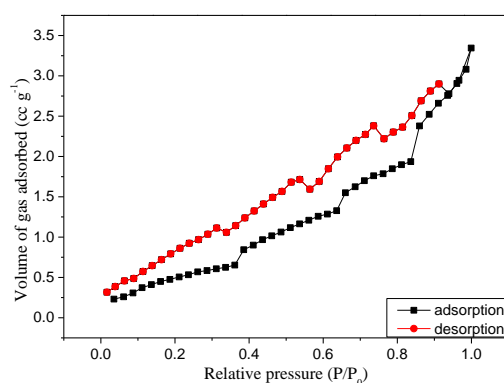

**Figure S6** The Nitrogen adsorption desorption isotherm plots of fly ash

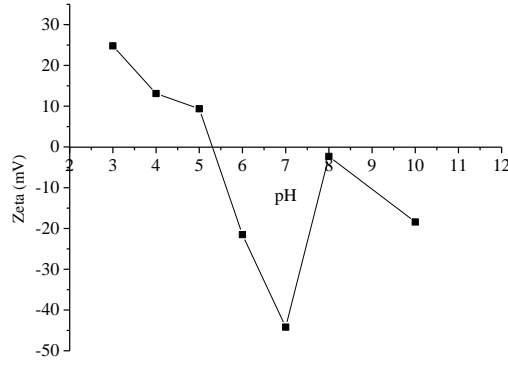

**Figure S7** PZC of MIL 53 (Al)@SiO<sub>2</sub>

### BPA adsorption experiment

$$\%R = \frac{(C_0 - C_e)}{C_0} \times 100 \quad (S1)$$

$$q_e = \frac{(C_0 - C_e)}{m} \times V \quad (S2)$$

$$q_t = \frac{(C_0 - C_t)}{m} \times V \quad (S3)$$

where,  $R$  and  $q_e$  represent the percentage BPA removal and BPA uptake by MIL 53 (Al)@SiO<sub>2</sub> at adsorption equilibrium (mg g<sup>-1</sup>), respectively. While the symbol  $q_t$  represents BPA uptake by MIL 53(Al)@SiO<sub>2</sub> at time  $t$ . The quantities  $C_0$  and  $C_e$  are the initial and equilibrium concentration of BPA in the aqueous solution, while  $V$  and  $m$  are the volume of the solution and adsorbent dosage, respectively.

### Adsorption isotherm models

The Langmuir adsorption isotherm model based on the assumption of identical and energetically equivalent active sites and monolayer adsorption, which follows the equation:

$$q_e = \frac{q_m C_e}{\left( \frac{1}{b} + C_e \right)} \quad (S4)$$

Where  $q_e$  and  $q_m$  are the dye or metal equilibrium uptake ( $\text{mg L}^{-1}$ ) and maximum monolayer adsorption capacity ( $\text{mg L}^{-1}$ ), respectively.  $b$  ( $\text{l/mg}$ ) represents Langmuir equilibrium constant. Whereas, Freundlich adsorption isotherm model describes a heterogeneous adsorption model, which is represented as:

$$q_e = K_f C_e^{\frac{1}{N}} \quad (\text{S5})$$

Where  $K_f$  is the empirical constant, which is used to indicate the adsorption capacity ( $\text{mg}^{1-\frac{1}{N}} \cdot \text{L}^{\frac{1}{N}} \cdot \text{g}^{-1}$ ) and  $N$  is the heterogeneity factor depending on the adsorbent and adsorbate of the system. Concurrently Temkin adsorption isotherm follows the equation:

$$q_e = \frac{RT}{b_T} \ln(AC_e) \quad (\text{S6})$$

( $RT/b_T$ ) and  $A$  are Temkin constants, here ( $RT/b_T$ ) depends on the heat of adsorption ( $\text{J mol}^{-1}$ ) and  $A$  is the equilibrium of binding constant corresponding the maximum binding energy ( $\text{L g}^{-1}$ ).  $R$  and  $T$  are the universal gas constant and the absolute temperature [1,2], respectively.

**Table S6** Adsorption isotherm parameters for BPA adsorption on MIL 53 (Al)@SiO<sub>2</sub>

| Adsorption isotherm Model      | Parameters         | Values          |        |        |
|--------------------------------|--------------------|-----------------|--------|--------|
|                                |                    | Temperature (K) |        |        |
|                                |                    | 283             | 303    | 318    |
| Langmuir adsorption isotherm   | $q_m(\text{mg/g})$ | 125.52          | 134.68 | 95.41  |
|                                | $B$                | 0.010           | 0.021  | 0.011  |
|                                | $R^2$              | 0.940           | 0.970  | 0.970  |
| Freundlich adsorption Isotherm | $k_f$              | 3.45            | 7.71   | 3.06   |
|                                | $N$                | 1.58            | 1.83   | 1.65   |
|                                | $R^2$              | 0.891           | 0.952  | 0.921  |
| Temkin adsorption isotherm     | $B$                | 128.28          | 94.26  | 131.57 |
|                                | $A_i$              | 0.240           | 0.270  | 0.125  |
|                                | $R^2$              | 0.909           | 0.957  | 0.961  |

## Adsorption kinetics model

The pseudo first order model [2] is established on the assumption that the rate of change of adsorption over time is directly proportional to the difference in saturation concentration and the amount of solid uptake over time. The model follows the equation:

$$\ln\left(\frac{q_e}{q_e - q_t}\right) = k_1 t \quad (S7)$$

Where,  $q_e$  (mg g<sup>-1</sup>) and  $q_t$  (mg g<sup>-1</sup>) are the mass of solute adsorbed on adsorbent at equilibrium and at agitation time  $t$  (min), respectively and  $k_1$  (mg g<sup>-1</sup>) the rate constant for pseudo-first order adsorption.

Pseudo second order equation [2] is based on the assumption that adsorption capacity is proportionate on the active sites on the adsorbent surface. The pseudo second order [2,3] model is represented by the equation:

$$\frac{1}{q_e - q_t} = \frac{1}{q_e} + k_2 t \quad (S8)$$

Here,  $k_2$  is the adsorption rate constant. Elovich adsorption kinetics model [3] is represented by

$$q_t = \frac{1}{\beta} \ln(\beta\alpha) + \frac{1}{\beta} \ln(t) \quad (S9)$$

$\alpha$  and  $\beta$  are the initial adsorption rate (mg g<sup>-1</sup> min) and the desorption constant (g mg<sup>-1</sup>), respectively.

Intraparticle diffusion model,[3] follows the equation:

$$q_t = k_{int} t^{0.5} + C \quad (S10)$$

Where,  $k_{int}$  is the rate constant of intra-particle diffusion model and  $C$  is related to the thickness of the boundary layer.

**Table S7** Adsorption kinetics fitting parameters and correlation coefficient for BPA adsorption on MIL 53 (Al)@SiO<sub>2</sub>

| Adsorption Kinetic Model  | Parameters                               | Values  |         |          |
|---------------------------|------------------------------------------|---------|---------|----------|
|                           |                                          | 30 mg/l | 80 mg/l | 110 mg/l |
| Pseudo-first order model  | $k_1(\text{min}^{-1})$                   | 0.020   | 0.081   | 0.287    |
|                           | $q_e(\text{mg g}^{-1})$                  | 22.110  | 38.007  | 68.560   |
|                           | $R^2$                                    | 0.990   | 0.860   | 0.952    |
| Pseudo-second order model | $k_2(\text{g mg}^{-1} \text{ min}^{-1})$ | 0.0005  | 0.003   | 0.007    |
|                           | $q_e(\text{mg g}^{-1})$                  | 32.360  | 42.760  | 72.410   |
|                           | $R^2$                                    | 0.991   | 0.931   | 0.985    |

|                                |                                                     |        |        |          |
|--------------------------------|-----------------------------------------------------|--------|--------|----------|
| Elovich kinetic model          | $\beta$ (mgg <sup>-1</sup> min <sup>-1</sup> )      | 0.157  | 0.138  | 0.164    |
|                                | $\alpha$ (mg g <sup>-1</sup> min <sup>-1</sup> )    | 1.190  | 21.644 | 1139.100 |
|                                | $R^2$                                               | 0.973  | 0.970  | 0.996    |
| Intra particle diffusion model | $k_{int}$ (mg g <sup>-1</sup> min <sup>-0.5</sup> ) | 2.355  | 2.710  | 2.412    |
|                                | $C$                                                 | -3.014 | 16.53  | 49.30    |
|                                | $R^2$                                               | 0.973  | 0.924  | 0.911    |

## Thermodynamic parameters

The values of  $\Delta H^0$ ,  $\Delta S^0$  and  $\Delta G^0$  can be calculated from the following equations:

$$\Delta G = -RT \ln K_d \quad (S11)$$

$$K_d = \frac{q_e}{C_e} \quad (S12)$$

$$\ln K_d = \left( \frac{-\Delta H}{RT} \right) + \left( \frac{\Delta S}{R} \right) \quad (S13)$$

$$\Delta S = \left( \frac{\Delta H - \Delta G}{T} \right) \quad (S14)$$

Here R is the universal gas constant with the value of 8.314 J mol<sup>-1</sup> K<sup>-1</sup> and T is the temperature in K [2].

**Table S8** Thermodynamic parameters for BPA adsorption on MIL 53 (Al)@SiO<sub>2</sub>

| $K_d$                  |        |        | $\Delta G^0$            |        |        | $\Delta H^0$            | $\Delta S^0$            |
|------------------------|--------|--------|-------------------------|--------|--------|-------------------------|-------------------------|
| (L mol <sup>-1</sup> ) |        |        | (kJ mol <sup>-1</sup> ) |        |        | (kJ mol <sup>-1</sup> ) | (kJ mol <sup>-1</sup> ) |
| 283(K)                 | 303(K) | 318(K) | 283(K)                  | 303(K) | 318(K) |                         |                         |
| 1.0436                 | 0.918  | 0.4657 | -0.1004                 | 0.208  | 1.990  | -20.53                  | -0.072                  |

142    **Reference**

- 143    [1]    S. Deng, Y.P. Ting, Fungal Biomass with Grafted Poly(acrylic acid) for Enhancement of  
144       Cu(II) and Cd(II) Biosorption, *Langmuir*. 21 (2005) 5940–5948. doi:10.1021/la047349a.
- 145    [2]    N.M. Mahmoodi, B. Hayati, M. Arami, Textile dye removal from single and ternary systems  
146       using date stones: Kinetic, isotherm, and thermodynamic studies, *J. Chem. Eng. Data*. 55  
147       (2010) 4638–4649. doi:10.1021/je1002384.
- 148    [3]    H. Mazaheri, M. Ghaedi, A. Asfaram, S. Hajati, Performance of CuS nanoparticle loaded on  
149       activated carbon in the adsorption of methylene blue and bromophenol blue dyes in binary  
150       aqueous solutions : Using ultrasound power and optimization by central composite design, *J.*  
151       *Mol. Liq.* 219 (2016) 667–676. doi:10.1016/j.molliq.2016.03.050.

152
